# Supplementary material for: Total Synthesis and Pharmacological Investigation of Cordyheptapeptide A
Source: MDPI journal article supplement (doi:10.3390/molecules22060682), 2017-05-27
Supplement: s1 [file s1]

Supporting Information

**Total Synthesis and Pharmacological Investigation of Cordyheptapeptide A**

Suresh Kumar<sup>1</sup>, Rajiv Dahiya<sup>2\*</sup>, Sukhbir Lal Khokra<sup>1</sup>, Rita Mourya<sup>3</sup>, Suresh V. Chennupati<sup>4</sup> and Sandeep Maharaj<sup>2</sup>

<sup>1</sup>*Institute of Pharmaceutical Sciences, Kurukshetra University,  
Kurukshetra, Haryana, India*

*sureshmpharma@rediffmail.com; slkhokra@kuk.ac.in*

<sup>2</sup>*Laboratory of Peptide Research and Development, School of Pharmacy,  
Faculty of Medical Sciences, The University of the West Indies,  
St. Augustine, Trinidad & Tobago, West Indies;*

*rajiv.dahiya@sta.uwi.edu; sandeep.maharaj@sta.uwi.edu*

<sup>3</sup>*School of Pharmacy, College of Medicine and Health Sciences,  
University of Gondar, Gondar, Federal Democratic Republic of Ethiopia; ritz\_pharma@yahoo.co.in*

<sup>4</sup>*Department of Pharmacy, College of Medical and Health Sciences,  
Wollega University, Nekemte, Federal Democratic Republic of Ethiopia;  
sureshchennupati@rediffmail.com*

| <i>Content</i>                                                                                                       | <i>Page</i> |
|----------------------------------------------------------------------------------------------------------------------|-------------|
| Figure S1.<br>Mass spectrum for the <i>N</i> -methylated cyclic heptapeptide, cordyheptapeptide A                    | .....2      |
| Figure S2.<br><sup>13</sup> C NMR spectrum for the <i>N</i> -methylated cyclic heptapeptide, cordyheptapeptide A     | .....3      |
| Table S1.<br>Various steric and lipophilicity parameters for the <i>N</i> -methylated linear and cyclic heptapeptide | .....4      |

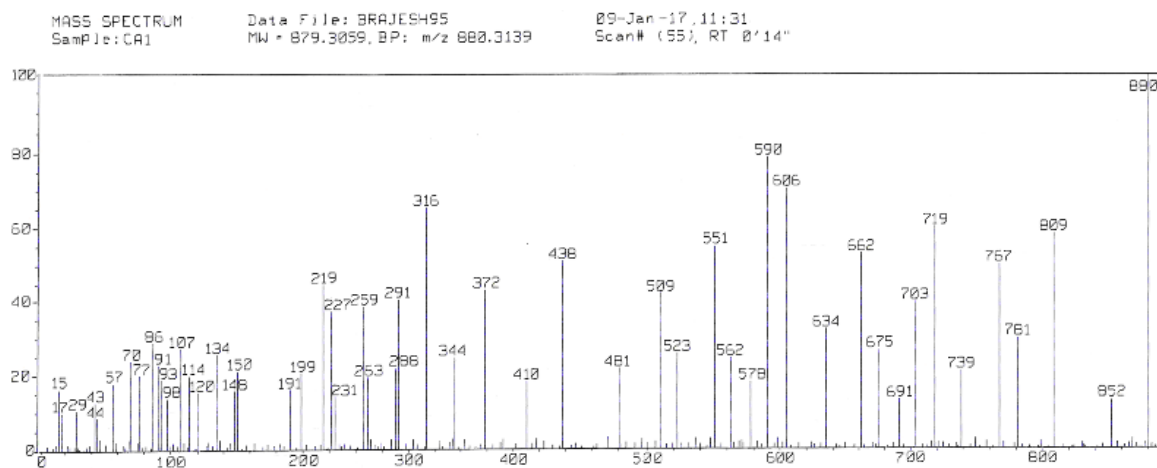

**Figure S1.** Mass spectrum for the *N*-methylated cyclic heptapeptide, cordyheptapeptide A (**8**)

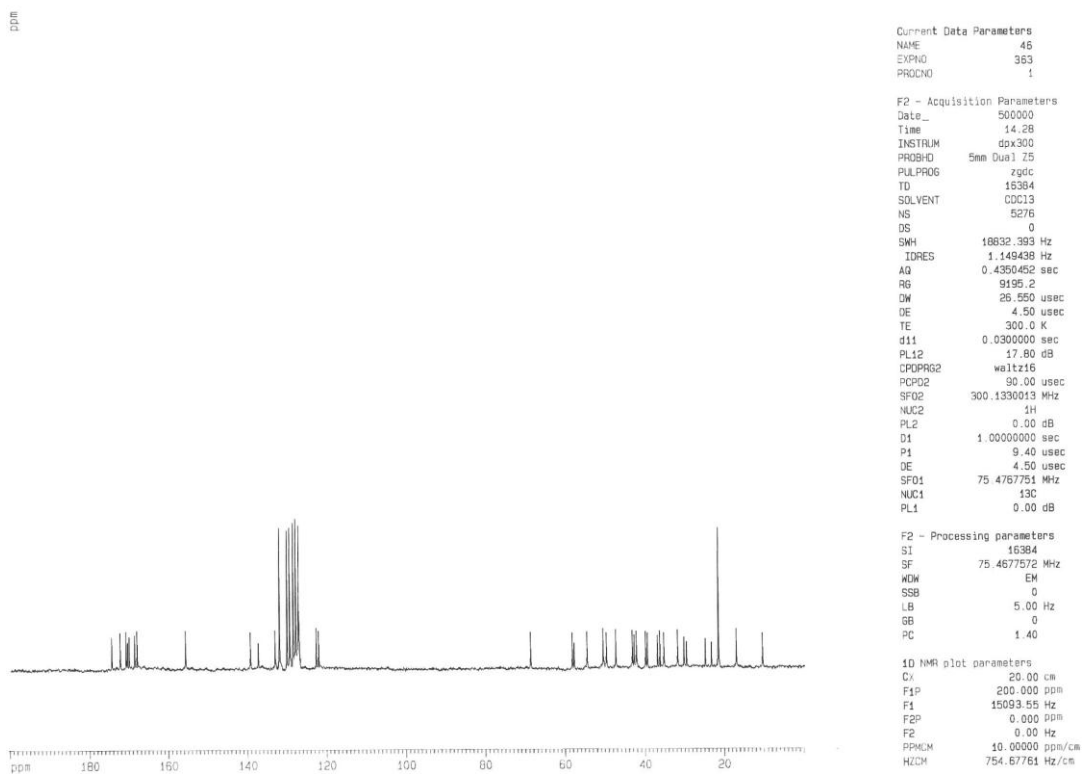

**Figure S2.**  $^{13}\text{C}$  NMR spectrum for the *N*-methylated cyclic heptapeptide, cordyheptapeptide A (8)

**Table S1.** Various steric and lipophilicity parameters for the *N*-methylated linear and cyclic heptapeptide (7, 8)

| Parameter                              | *Calculated value for                          |                                               |
|----------------------------------------|------------------------------------------------|-----------------------------------------------|
|                                        | Compound 7                                     | Compound 8                                    |
| Molar Refractivity (MR <sup>20</sup> ) | 275.41 ± 0.3 cm <sup>3</sup>                   | 244.28 ± 0.4 cm <sup>3</sup>                  |
| Molar Volume (MV <sup>20</sup> )       | 847.8 ± 3.0 cm <sup>3</sup>                    | 697.3 ± 5.0 cm <sup>3</sup>                   |
| Parachor (P <sub>r</sub> )             | 2271.7 ± 6.0 cm <sup>3</sup>                   | 1959.7 ± 6.0 cm <sup>3</sup>                  |
| Refractive Index (n <sup>20</sup> )    | 1.563 ± 0.02                                   | 1.617 ± 0.03                                  |
| Surface Tension (γ <sup>20</sup> )     | 51.5 ± 3.0 dyne/cm                             | 62.3 ± 5.0 dyne/cm                            |
| Density (d <sup>20</sup> )             | 1.193 ± 0.06 g cm <sup>-3</sup>                | 1.26 ± 0.1 g cm <sup>-3</sup>                 |
| Polarizability (α)                     | 109.18 ± 0.5 10 <sup>-24</sup> cm <sup>3</sup> | 96.84 ± 0.5 10 <sup>-24</sup> cm <sup>3</sup> |
| log P (n-Octanol/water)                | 8.30 ± 0.89                                    | 5.43 ± 0.90                                   |

\*Values were calculated using the ACD/ChemSketch 2.0 software
